# Supplementary material for: Development and Validation of Equations for Predicting the Metabolizable Energy Value of Double-Low Rapeseed Cake for Growing Pigs
Source: MDPI journal article supplement (doi:10.3390/ani11041168), 2021-04-19
Supplement: s1 [file s1]

## Supplementary

**Table S1.** Chemical compositions and metabolizable energy values of double-low rapeseed cakes used in Exp. 1 (% DM basis) <sup>1</sup>

| Item                   | Double-low rapeseed cakes |       |       |       |       |       |       |       |       |       |
|------------------------|---------------------------|-------|-------|-------|-------|-------|-------|-------|-------|-------|
|                        | 1                         | 2     | 3     | 4     | 5     | 6     | 7     | 8     | 9     | 10    |
| DM                     | 95.82                     | 92.25 | 92.41 | 90.28 | 92.65 | 92.33 | 90.79 | 92.17 | 93.45 | 91.84 |
| GE, MJ/kg              | 21.20                     | 20.94 | 21.41 | 21.66 | 21.08 | 20.88 | 21.45 | 20.90 | 20.66 | 20.70 |
| CP                     | 39.59                     | 38.67 | 39.34 | 38.28 | 38.26 | 40.87 | 39.89 | 37.75 | 40.07 | 38.18 |
| EE                     | 8.38                      | 10.44 | 10.23 | 11.14 | 10.72 | 9.27  | 9.84  | 10.76 | 8.75  | 9.83  |
| NDF                    | 53.78                     | 49.00 | 37.91 | 34.95 | 37.28 | 39.89 | 45.02 | 48.15 | 41.76 | 39.22 |
| ADF                    | 30.15                     | 29.46 | 22.84 | 23.38 | 23.54 | 25.22 | 27.72 | 26.97 | 24.53 | 22.99 |
| CF                     | 18.52                     | 19.45 | 16.28 | 17.99 | 18.76 | 19.12 | 19.35 | 18.70 | 17.17 | 16.15 |
| Ash                    | 5.89                      | 7.66  | 7.85  | 6.92  | 7.23  | 6.87  | 7.42  | 8.04  | 7.40  | 7.83  |
| Ca                     | 0.58                      | 0.65  | 0.98  | 0.75  | 0.70  | 0.66  | 0.71  | 0.86  | 0.72  | 0.78  |
| TP                     | 0.83                      | 1.02  | 1.20  | 1.02  | 1.22  | 1.04  | 1.06  | 1.18  | 1.05  | 1.17  |
| TGS, $\mu\text{mol/g}$ | 7.40                      | 10.00 | 5.40  | 28.90 | 14.30 | 23.70 | 9.90  | 11.60 | 17.80 | 21.00 |
| ME, MJ/kg              | 11.93                     | 12.16 | 14.41 | 14.11 | 13.10 | 13.37 | 12.98 | 12.43 | 13.00 | 13.84 |

DM, dry matter; GE, gross energy; CP, crude protein; EE, ether extract; NDF, neutral detergent fiber; ADF, acid detergent fiber; CF, crude fiber; TP, total phosphorus; TGS, total glucosinolates; ME, metabolizable energy

<sup>1</sup>Data of double-low rapeseed cakes were derived from published study in our laboratory [6].
